# Supplementary material
Source: Research Square preprint supplement (doi:10.21203/rs.3.rs-9695993/v1)
Supplement: Supplementary file 1 [file 440d3a41c57fb55c4c90af91.xlsx]

## Sheet: Tabelle1
STable 6: List of non-vent taxa with a minimum distance of 500 m to active and inactive vent fields in the surrounding of the vent fields Sonne, Alpha, Edmond, Gauss, Score, Kairei, Kaimana, Sooraj, Pelagia, JIM, New Sonne, Huna, Penumbra, Umbra and Lux (from north to south). Presence of each taxon indicated as low ('+'), medium ('++'), high ('+++') or very high ('++++') density. Low density = 1 …
Phylum	Non-Vent Taxa	Sonne	ALPHA	Edmond	Gauss	Score	Kairei	Kaimana	Sooraj	Pelagia	JIM	New Sonne	Huna	Penumbra	Umbra	Lux
Annelida	Errantia ord. indet.		++	+		++		++			++		++			++
	Polynoidae fam. inc.	+	++	++		++	++	++	++		++	+			+
	Sabellidae gen. indet.	++	++++	++		+		+++		++	++					+++
	Acrocirridae fam. inc.	+++	++		+	++	+	+		+++
Arthropoda	Decapoda fam. indet.	++												++
	Anomura sp.	+		+				+
	Galatheidae fam. inc.	++
	Munidopsis sp. indet.	++	+++	++	++			++			+++			+
	Munidopsis aries sp. inc.			++				+						+
	Munidopsis pallida sp. inc.			++							+	+
	Paguroidea superfam. inc.		++	+++	+++	++++	++				+++					++
	Thymopides laurentae sp. inc.		+								+
	Austinograea rodriguezensis+		+		++	++		+
	Caridea fam. indet.		+++			+++		+++			+++		+++			+++
	Caridea spp. indet. (DZMB_2022_0028)	+++		++	++	+++	+++	+++	+	++	++++	+	++	++	+++
	Caridea spp. indet. (DZMB_2022_0029)							+
	Caridea spp. indet. (DZMB_2022_0032)					+
	Rimicaris kairei+		++		+++	+++	++	++		++	++		+	++
	Nematocarcinus gen. inc.		+++	+		+++	++	+++	+++		++++	++	++	++	++	+++
	Nematocarcinus gen. inc. (DZMB_2021_0004)	+++			++	++	++	+++	+++		++		+	+++
	Nematocarcinus gen. inc. (DZMB_2021_0005)	++		+++	++	++		+++			++
	Dendrobranchiata subord. inc.						+	++	+		+
	Cerataspis monstrosus sp. inc.	+++	++++	++	+++	++++	++++	++++	+++	++	++++	+	++	+++	++	+++
	Munnopsidae fam. inc.		++
	Munnopsidae fam. inc. (DZMB_2021_0006)							+
	Isopoda fam. indet.											+
	Pantopoda ord. inc.				+	++
	Polychelidae gen. indet.							+			+
	Cirripedia ord. indet.	+										+
	Neolepas marisindica sp. inc.+	+
	Verrucidae fam. inc.										++
Bryozoa	Bifaxaria gen. inc.	++					+
	Cheilostomatida fam. indet. (DZMB_2021_0008)	++								++
	Tessaradoma gen. inc.	++++
Chordata	Teleostei ord. indet.	+++	+++	++	++++	++++	+++	+++	++	++	+++	+	++	+++
	Teleostei ord. indet. (INES_2023_0008)															+
	Teleostei ord. indet. (BGR_2024_0001)		+
	Anguilliformes fam. indet.					++	+	+
	Synaphobranchidae gen. indet.		+	+		++	++	+++		+	++		+	++
	Bathysaurus mollis sp. inc.		+++	++	+	+++	++	++	++	+	+++		++		+	++
	Bathypterois sp. indet.				+	++					++		++		+	+
	Ipnops agassizii sp. inc.		++	+++	++	++++	++	+++	++	+	+++			+		++
	Gadiformes Macrouridae ord. inc.		++		+		+++	++	+	++	+			+
	Gadiformes Macrouridae ord. inc. (DZMB_2021_0010)													+
	Macrouridae gen. indet.		++					+			++		+	+		++
	Macrouridae Coryphaenoides gen. inc.		+
	Coryphaenoides gen. inc.		+++	++		++	+++	+++	+++		+++	++	+	+++		++
	Coryphaenoides gen. inc. (DZMB_2021_0013)										++			++
	Coryphaenoides armatus sp. inc.	++	+	+	++	++	+	++		++			+
	Antimora rostrata							++			+
	Notacanthiformes ord. inc.		++	++	++	+++	++	++		++			+	++		+
	Aldrovandia affinis gen. inc.	++	++++	+++	++	++++	++	+++	++	++	++++	++	+++	++	+	+++
	Halosauropsis macrochir gen. inc.		++	+		++	+++	++	++		+++		+++	+++	++	+++
	Ophidiidae fam. inc.		++			+	+++	++	++		++		++		+	++
	Ophidiidae fam. inc. (DZMB_2021_0016)	+					++
	Ophidiidae gen. indet. (DZMB_2021_0015)						+
	Acanthonus armatus gen. inc.			+			+						++
	Barathrites gen. inc.		+++	+		++		+	++			++		++
	Barathrites iris sp. inc.			+							+
	Bassozetus gen. inc.			+				+		+
	Spectrunculus crassus sp. inc.						++++	++		+
	Spectrunculus grandis sp. inc.										++
	Xyelacyba myersi gen. inc.						+++						+++
	Pachycara angeloi+					+
	Ascididacea ord. indet.										+
	Octacnemidae gen. indet.	++						+	+		+				++
	Culeolus sp. indet.						++	++			+
	Bathyraja tunae sp. inc.						+	+
Cnidaria	Cnidaria cl. indet.					+										++
	Cnidaria cl. indet. (DZMB_2022_0002)	+++	+			++		+++		+	++	++	++	+++		++
	Anthozoa ord. indet.										++				+
	Ceriantharia ord. indet.			+	+	++
	Spirularia fam. indet.					+
	Hexacorallia ord. indet. (DZMB_2023_0007)							++						++
	Hexacorallia ord. indet. (DZMB_2023_0008)													+
	Actiniaria fam. indet.		+++	++		++		+++	+		++		++			+
	Actiniaria fam. indet. (BGR_2024_0002)							+
	Actiniaria fam. indet. (DZMB_2021_0017)			+++		+++	+	++			++
	Actiniaria fam. indet. (DZMB_2021_0018)					+					+
	Actiniaria fam. indet. (DZMB_2021_0020)	++				+	++++	++			++
	Actiniaria fam. indet. (DZMB_2021_0021)				+
	Actiniaria fam. indet. (DZMB_2021_0022)			++	++	++
	Actiniaria fam. indet. (DZMB_2021_0025)	+++	++		+	++	++	++		+++				++
	Actinoscyphiidae gen. indet. (DZMB_2021_0026)		++													+++
	Actinoscyphia sp. indet.							+			++
	Actinostolidae gen. indet.			+			+++	++			+++			++
	Actinostolidae gen. indet. (INES_2023_0001)		+
	Actinostola gen. inc.		+++			++		+++	++		+++	++	++	+		++
	Actinostola sp. indet. (DZMB_2021_0028)	+		+++	+		+	++			+++		+
	Actinostola sp. indet. (DZMB_2021_0031)	+
	Bathyphellia sp. indet.		++								+
	Bathyphellia sp. indet. (DZMB_2021_0032)				++	+		+
	Relicanthus daphneae sp. inc.		++									+
	Iridogorgia magnispiralis sp. inc.							++					++	+++	+++	+++
	Clavulariidae gen. indet. (DZMB_2021_0036)	+++
	Coralliidae fam. inc.	+									+					++
	Alcyonacea Anthomastus gen. inc.												+			++
	Anthomastus sp. indet.							+
	Chrysogorgia sp. indet.							+							+
	Keratoisididae fam. inc.		++++					++++	+++		++++	+++	+++	+++	+	++++
	Keratoisididae gen. indet. (DZMB_2021_0041)															++
	Keratoisididae gen. indet. (DZMB_2021_0042)										+
	Keratoisididae Acanella gen. inc.	+++						+					+	+		+
	Keratoisididae Bathygorgia gen. inc.							++			+++	++	++++	++	++	++++
	Keratoisididae Jasonisis gen. inc.	++++			++			+++			++		++	+++	++	++++
	Keratoisididae Jasonisis gen. inc. (INES_2023_0003)															+
	Keratoisididae Keratoisis gen. inc.							++			+			++		++
	Keratoisididae Keratoisis gen. inc. (DZMB_2021_0047)							+
	Lepidisis spp. indet.		++	++	+	++	++++	++++		++	++++	++	+++	+++	++++	+++
	Primnoidae gen. indet.				+						+		+++			++
	Primnoidae gen. indet. (DZMB_2021_0048)										++
	Primnoidae gen. indet. (DZMB_2021_0049)							+			++
	Antipatharia ord. inc.						+			++	++	+		++
	Heteropathes sp. indet.	+			++	++	+	++	++		++			+++	+++	++++
	Heteropathes sp. indet. (INES_2023_0005)															+
	Heteropathes americana sp. inc.															++++
	Bathypathes sp. indet.		++			+		+++	++		+++	++	++			++
	Bathypathes sp. indet. (DZMB_2021_0050)										++
	Bathypathes patula sp. inc.			+		++	++	++	+		++			+	++
	Schizopathes spp. indet.										+					++
	Pennatuloidea superfam. inc.										+					++++
	Pennatuloidea fam. indet. (DZMB_2021_0053)															+
	Umbellula sp. indet.		++					++	+		++++	+	++			++++
	Umbellula sp. indet. (DZMB_2021_0054)							++
	Umbellula sp. indet. (DZMB_2021_0055)	+				++	++	+++	++		+++		++	++	+	+++
	Zoantharia fam. indet.										++
	Zoantharia fam. indet. (DZMB_2021_0056)	++			++
	Epizoanthus sp. indet.			+++	+	++	+++				++
	Hydrozoa ord. indet.		++	+	++	++				+				++		++
	Hydrozoa ord. indet. (DZMB_2021_0059)													+
	Hydrozoa ord. indet. (DZMB_2021_0063)													+
	Hydrozoa ord. indet. (INES_2023_0004)															+
	Corymorphidae gen. indet.										+
	Siphonophorae Rhodalidae Thermopalia gen. inc.		++			++
	Scyphozoa ord. indet.	+++	+++		++++	++++	++	++	++	+++	+		++	+		++
Ctenophora	Ctenophora cl. indet.												+
Echinodermata	Echinodermata cl. indet.		+				+							++
	Asteroidea ord. indet.	++	++	+	+++	+++	++	+++	++	+	+++		++	++		+++
	Brisingida fam. indet.		+++			++	++	+++			+++			++		+++
	Hymenodiscus gen. inc.						+			+	+			+
	Freyellidae fam. inc.		++	++	++	+++	++	+++		+	+++	+	++			+++
	Freyastera gen. inc.	++		+		+		++
	Freyella gen. inc.				+	+					1
	Styracaster gen. inc.	++	++	+	+						+++		++
	Henricia gen. inc.							+			++			++		+
	Goniasteridae gen. indet.		++				++	++	+++		+++		++	++
	Goniasteridae gen. indet. (DZMB_2021_0066)		+					+
	Goniasteridae gen. indet. (DZMB_2021_0067)			++
	Evoplosoma gen. inc.													++
	Lydiaster johannae sp. inc.			+
	Solasteridae fam. inc.									+
	Hymenaster sp. indet.							+
	Crinoidea ord. indet.			+				++			+					+
	Antedonidae fam. inc. (DZMB_2021_0069)	++			++	+				+
	Antedonidae gen. indet. (DZMB_2021_0068)	++							+		++				+
	Antedonidae gen. indet. (DZMB_2023_0003)	++	+		+	+		++		++				++
	Bathymetra gen. inc.	+								++
	Pentametrocrinus sp. indet.	++								+
	Hyocrinidae gen. indet.				+			++	++	++	++			+	++
	Echinoidea ord. indet.	++	+	+	++	++	+	++		+	++		+	++		+
	Echinoidea ord. indet. (DZMB_2023_0004)													+
	Irregularia infracl. inc.								+
	Cidaroida fam. indet.							+
	Hapalosoma sp. indet.		++	++		+		+	+		++					+
	Salenocidaris sp. indet.								+					+
	Holothuroidea ord. indet.	+++	++		+++	+++	++	+++	+	++	+++		++	++	++	++
	Holothuroidea ord. indet. (DZMB_2023_0012)				+		+
	Elpidiidae gen. indet.							++			+++				++
	Elpidiidae gen. indet. (DZMB_2021_0070)	+			+	++		+++
	Elpidiidae gen. indet. (DZMB_2021_0071)							+	++		+
	Elpidiidae gen. indet. (DZMB_2021_0072)									++	+
	Peniagone purpurea					++
	Laetmogonidae gen. indet.	++	+		++	+								+		+
	Enypniastes eximia		++	++		++	++	++	++		++		+
	Psychropotidae gen. indet.							+	++		++			++
	Benthodytes sp. indet.	++	++		+	++	++	+++			++				+
	Pseudostichopus gen. inc.							+	+		+++					+++
	Pseudostichopus gen. inc. (DZMB_2021_0073)							+			+
	Pseudostichopus gen. inc. (DZMB_2021_0074)										++			++
	Oneirophanta sp. indet.	++		+		+				+	+
	Synallactidae fam. inc.		++					+++	+		++++		+	++	+	++
	Synallactidae gen. indet. (DZMB_2021_0075)	++	+			+	+	++		+	++	++
	Synallactidae gen. indet. (DZMB_2021_0076)	++	+	+	++	+++	++	++	+	++	+++		+
	Synallactidae gen. indet. (DZMB_2021_0077)	++			+	++	+	++			++
	Synallactidae gen. indet. (DZMB_2021_0078)									+
	Synallactidae gen. indet. (DZMB_2021_0079)	+
	Synallactes sp. indet.	+				+				+
	Ophiuroidea ord. indet.	++	++		++	+++	+++	+++	+		++++		+++	++++	++	++++
	Amphilepidida ord. inc.							+
	Asteronyx gen. inc.							+
	Ophiacanthida ord. inc.							+			++					++
	Ophiosphalma gen. inc.							++	+		+++				+++
	Ophiosphalma armigerum sp. inc.	++			+		+	+			+			++
Mollusca	Octopoda fam. indet.		++		+	++		++		+
	Cirroteuthis sp. indet.					+	+	++
	Grimpoteuthis gen. inc.						++
	Magnapinna sp. indet.							+		++
	Gastropoda ord. indet.		+++
	Speculator gen. inc.			+			+
	Scaphopoda ord. indet.	++	+++		++			+++	+		++++			++	++	+
Porifera	Porifera cl. indet.				+
	Porifera cl. indet. (DZMB_2022_0010)							++
	Porifera cl. indet. (DZMB_2022_0011)							++
	Porifera cl. indet. (DZMB_2022_0012)							+
	Porifera cl. indet. (DZMB_2022_0015)							+
	Porifera cl. indet. (DZMB_2022_0016)					+
	Porifera cl. indet. (DZMB_2022_0017)							+++
	Porifera cl. indet. (DZMB_2022_0018)	+	++	+	++	+++	+++	++++	+++	++++	+++	++	+	++	++	++
	Porifera cl. indet. (DZMB_2022_0019)	++++			++	++	++	+++			++		+	++
	Porifera cl. indet. (DZMB_2022_0021)					+
	Porifera cl. indet. (DZMB_2022_0022)						+
	Porifera cl. indet. (DZMB_2022_0024)						++	+++				+
	Porifera cl. indet. (DZMB_2022_0026)	+
	Porifera cl. indet. (DZMB_2022_0027)	+
	Paleodictyon nodosum	++++
	Axinellida fam. indet.				++			++++	++		++++	++	++	++	++	++
	Abyssocladia gen. inc. (DZMB_2022_0006)					+					+
	Abyssocladia gen. inc. (DZMB_2022_0007)		+		+		++	++			+	++				++
	Abyssocladia gen. inc. (DZMB_2023_0016)										++
	Euchelipluma gen. inc.				+			+
	Geodia gen. inc.		+		+	++	+	+++	++	++	+++				++	++
	Hyalonema gen. inc.							+++	+++		+++			+	++	++
	Hyalonema gen. inc. (DZMB_2022_0033)					++	+	+++		+++
	Hyalonema gen. inc. (DZMB_2022_0034)			+	++	++
	Bathydorus gen. inc.						+	+++			++					+
	Caulophacus gen. inc.	+	++		++	++	+	+++	+		+++	+	+
	Chonelasma gen. inc.			+	++	++
	Tretodictyidae gen. indet.			+	+			+++			+++	++			+++
	Tretodictyidae gen. indet. (DZMB_2023_0009)										+++				+
	Hexactinellida Hexactinella ord. inc.							++			++
Foraminifera	Monothalamea ord. indet.					++			+
	Monothalamea ord. indet. (DZMB_2021_0080)	++			+	++		++
	Monothalamea ord. indet. (DZMB_2021_0081)			++		++				+
	Monothalamea ord. indet. (DZMB_2021_0082)	+++			+
	Stannoma gen. inc.			+
	Luffammina gen. inc.	++++			+++	+++				+++
	Psammina gen. inc. (DZMB_2021_0083)	+++		++	++		+			+
