# Supplementary material
Source: Research Square preprint supplement (doi:10.21203/rs.3.rs-9695993/v1)
Supplement: Supplementary file 2 [file 7a0e8d9837f9f8d416418e0e.xlsx]

## Sheet: Tabelle1
STable 5: List of periphery taxa in the direct vicinity up to 500 m distance to vent fields in the surrounding of the vent fields Alpha, Edmond, Gauss, Score, Kairei, Kaimana, Surya, Sooraj, Pelagia, JIM, New Sonne, Huna, Penumbra and Lux (from north to south). Presence of each taxon indicated as low ('+'), medium ('++'), high ('+++') or very high ('++++') density. Low density = 1 specimen, mediu…
Phylum	Periphery taxa	Alpha	Edmond	Gauss	Score	Kairei	Kaimana	Surya	Sooraj	Pelagia	JIM	New Sonne	Huna	Penumbra	Lux
Annelida	Polychaeta ord. indet. (DZMB_2022_0001)								++
	Errantia ord. indet.						+++	++
	Archinome jasoni sp. inc.+										++
	Lepidonotopodium gen. inc. (DZMB_2021_0001)+						+
	Polynoidae fam. inc.	+++					+++	+	++			++	++	++
	Sabellidae gen. indet.	++					+++			+		+++	++
	Acrocirridae fam. inc.	++					++			+++		+	++	+
Arthropoda	Malacostraca ord. indet.													++
	Amphipoda ord. inc.	+					++
	Decapoda fam. indet.											+	++	++
	Galatheidae fam. inc.												+
	Munidopsis sp. indet.	++++	+++		++	+++	+++	++	+++	++	++	++	+++	++	++
	Munidopsis pallida sp. inc.									++	++	+
	Paguroidea superfam. inc.	+++			+		+++						++++	+++
	Thymopides laurentae sp. inc.	++										+
	Austinograea rodriguezensis+	++++		+			+++	+		++	+	+++	+++	+++
	Caridea spp. indet. (DZMB_2022_0028)	+++					++		++	+++		++	+++	++++
	Caridea spp. indet. (DZMB_2022_0029)												+
	Caridea spp. indet. (DZMB_2022_0032)						+						+	+
	Alvinocaris solitaire sp. inc.+	++					+		+				++
	Mirocaris indica sp. inc.+	++					++			++
	Rimicaris kairei+	++++				++	++++		++	++	++	++	+++	+++
	Nematocarcinus gen. inc.	++				++	+++		+++		++		+++	+++
	Nematocarcinus gen. inc. (DZMB_2021_0004)	++				++	+++		+			++	++	+++
	Nematocarcinus gen. inc. (DZMB_2021_0005)						++					+	++	++
	Dendrobranchiata subord. inc.											++	++	+
	Cerataspis monstrosus sp. inc.	+++	+			+++	++++	++	+++	++	+++	++	++++	++++
	Munnopsidae fam. inc. (DZMB_2021_0006)	+++
	Polychelidae gen. indet.	+
	Neolepas marisindica sp. inc.+	+++				+						+	+	++
	Verrucidae fam. inc.	+				+			+		+++	+		++
Bryozoa	Bifaxaria gen. inc.											+++
	Cheilostomatida fam. indet. (DZMB_2021_0008)											+	+
	Tessaradoma gen. inc.												+
Chordata	Teleostei ord. indet.	++++		++		++	+++	+	++	++		+++	++++	++++
	Anguilliformes fam. indet.					+++			++				++	+++
	Synaphobranchidae gen. indet.	+++	+		++		+++		+++	+	+	++	++	+++	++
	Bathysaurus mollis sp. inc.	+++				++	+++		++		++	++	++	++
	Bathypterois sp. indet.						+						+++	+
	Ipnops agassizii sp. inc.	+++				+	+++				++	++	+++	++
	Gadiformes Macrouridae ord. inc.	+++				+++	+		++	++		+++	++	+++
	Gadiformes Macrouridae ord. inc. (DZMB_2021_0011)													+
	Macrouridae gen. indet.										+
	Coryphaenoides gen. inc.	+++	+			++	++		+++		++		+++	+++
	Coryphaenoides gen. inc. (DZMB_2021_0012)								+
	Coryphaenoides gen. inc. (DZMB_2021_0013)					+						+
	Coryphaenoides armatus sp. inc.	+++					+++	+	+	+++		++	++	+++
	Chaunacops gen. inc.											+
	Notacanthiformes ord. inc.	++					+			++		+++	++	+++
	Aldrovandia affinis gen. inc.	++++				++	+++	++	++			++	+++	+++
	Halosauropsis macrochir gen. inc.	+				+++	++		+++	++	+	++	++++	++++
	Ophidiidae fam. inc.					+					++		+++	++
	Acanthonus armatus gen. inc.												++	++
	Barathrites iris sp. inc.	+++							+				+	++
	Bassozetus gen. inc.								+	++		++		++
	Spectrunculus crassus sp. inc.						+	++					+	+
	Spectrunculus grandis sp. inc.	+										++		+
	Xyelacyba myersi gen. inc.					++			+				+++	++
	Pachycara angeloi+	+++					++		+++	++
	Culeolus sp. indet.													+
Cnidaria	Cnidaria cl. indet. (DZMB_2022_0002)	++					+++						++	+++
	Ceriantharia ord. indet.	++					+						+
	Hexacorallia ord. indet. (DZMB_2023_0007)											+	++	++
	Hexacorallia ord. indet. (DZMB_2023_0008)												+
	Actiniaria fam. indet.	++							++			+		++
	Actiniaria fam. indet. (BGR_2024_0003)						+
	Actiniaria fam. indet. (DZMB_2021_0017)	+++	++				++		++			+	++	++
	Actiniaria fam. indet. (DZMB_2021_0018)	++										++		++
	Actiniaria fam. indet. (DZMB_2021_0019)											++
	Actiniaria fam. indet. (DZMB_2021_0020)	++++					++	++	+++			++	+	+
	Actiniaria fam. indet. (DZMB_2021_0022)											+
	Actiniaria fam. indet. (DZMB_2021_0025)	++++					++	+		++++		+++	++	+++
	Actinoscyphiidae gen. indet. (DZMB_2021_0026)	++					+		++			+	++	+
	Actinoscyphia sp. indet.						++						++	++
	Actinostolidae gen. indet.	++++			++	+++	+++	+	++++		++++	+++	++++	++++	++
	Actinostolidae gen. indet. (INES_2023_0001)						+
	Actinostola gen. inc.	++					+++		++
	Actinostola sp. indet. (DZMB_2021_0028)	+	+				++			++		++	+++	++
	Actinostola sp. indet. (DZMB_2021_0029)								++			++
	Actinostola sp. indet. (DZMB_2021_0030)	++++				+			+++			+++
	Actinostola sp. indet. (DZMB_2021_0031)	+						+					+	+
	Bathyphellia sp. indet.	+							+				+++	+
	Bathyphellia sp. indet. (DZMB_2021_0032)	++					+					++	+
	Chondrophellia sp. indet.	+++						++		++			++	+
	Maractis sp. indet.+	++++				++++	+++	+++	+++	+++	++++	+++	+++	++
	Relicanthus daphneae sp. inc.	++					+					+
	Iridogorgia magnispiralis sp. inc.						++		++			++	+++	++++
	Clavulariidae gen. indet. (DZMB_2021_0036)													+
	Keratoisididae fam. inc.	++				+	+++		++		+++		++++	++++
	Keratoisididae Acanella gen. inc.								+					++
	Keratoisididae Bathygorgia gen. inc.	+							++		+	+	++	+++
	Keratoisididae Jasonisis gen. inc.						++					+	++	++++
	Keratoisididae Keratoisis gen. inc.													+++
	Keratoisididae Lepidisis gen. inc. (DZMB_2022_0004)								+
	Keratoisididae Lepidisis gen. inc. (DZMB_2022_0005)								++
	Lepidisis spp. indet.	++					++++	++++	+++	+		++++	++++	++++
	Primnoidae gen. indet.												+
	Antipatharia ord. inc.											++	+	++
	Heteropathes sp. indet.	++					++		++			++	++	++++
	Heteropathes americana sp. inc.								+					++
	Bathypathes sp. indet.	++					++				+++
	Bathypathes patula sp. inc.	+++					+++		++				+++	++++
	Schizopathes spp. indet.													+
	Pennatuloidea superfam. inc.										+
	Pennatuloidea superfam. inc. (DZMB_2021_0052)													+
	Umbellula sp. indet.	+									+
	Umbellula sp. indet. (DZMB_2021_0055)						+++		++			++	++++	++++
	Zoantharia fam. indet.	+++	+			+++	++		+++		+++	+	++	+++
	Zoantharia fam. indet. (DZMB_2021_0056)	++					+	++	+++		+++		++	++
	Epizoanthus sp. indet.	++
	Hydrozoa ord. indet.	+++					++	+	+	++		+	++	++
	Hydrozoa ord. indet. (DZMB_2021_0059)												+
	Candelabrum sp. indet.+	++	+				+		+
	Corymorphidae gen. indet.											+++
	Scyphozoa ord. indet.	+++		++			++			+++		++	+	++
Echinodermata	Echinodermata cl. indet.													+
	Asteroidea ord. indet.	+++					++		++	+	++	++	+++	+++
	Brisingida fam. indet.	++				+	++				++		++	++
	Freyellidae fam. inc.	+++			+		+++	+		++		+++	+++	++
	Freyastera gen. inc.											++
	Freyella gen. inc.						++					++
	Styracaster gen. inc.										++			+++
	Henricia gen. inc.	+					+
	Goniasteridae gen. indet.	+					+		+++		+++		++	+++
	Goniasteridae gen. indet. (DZMB_2021_0066)						+				++		+	+
	Lydiaster johannae sp. inc.												++
	Hymenaster sp. indet.											+
	Pteraster gen. inc.											+
	Antedonidae fam. inc. (DZMB_2021_0069)											+		+
	Antedonidae gen. indet. (DZMB_2021_0068)									+
	Antedonidae gen. indet. (DZMB_2023_0003)						+					++
	Pentametrocrinus sp. indet.											++
	Hyocrinidae gen. indet.									+			++	++
	Echinoidea ord. indet.	++					++				+		+	+++
	Echinoidea ord. indet. (DZMB_2023_0005)						+
	Irregularia infracl. inc.						++						++	++
	Hapalosoma sp. indet.	++
	Salenocidaris sp. indet.													+++
	Holothuroidea ord. indet.	++				+	+++	++	+	++		++	+++	+++
	Chiridota hydrothermica sp. inc.+						++				+	+	++
	Elpidiidae gen. indet.												++
	Elpidiidae gen. indet. (DZMB_2021_0070)						++					+	++
	Elpidiidae gen. indet. (DZMB_2021_0071)												+
	Laetmogonidae gen. indet.											+	++	++
	Enypniastes eximia	++					++	+				+	++
	Psychropotidae gen. indet.												++
	Benthodytes sp. indet.	+										+
	Pseudostichopus gen. inc.										+			++
	Synallactidae fam. inc.	+					+		++		++		++	++
	Synallactidae gen. indet. (DZMB_2021_0075)											++		+
	Synallactidae gen. indet. (DZMB_2021_0076)						++					++
	Synallactidae gen. indet. (DZMB_2021_0077)									+
	Ophiuroidea ord. indet.						++	+	++		++	++	+++	++++
	Asteronyx gen. inc.											+		+
	Ophiacanthida ord. inc.											++
	Ophiophyllum petilum sp. inc.											+
	Ophiosphalma gen. inc.					+							++++	++++
	Ophiosphalma armigerum sp. inc.													++
Mollusca	Mollusca cl. indet.													++
	Bathymodiolus septemdierum sp. inc.+						++		+		+++	+	++	++
	Octopoda fam. indet.						+			+		++
	Bathypolypus sp. indet.	+										+++
	Cirroteuthis sp. indet.									+				+
	Grimpoteuthis gen. inc.						++							+
	Gastropoda ord. indet.	+				+	++							++
	Gastropoda ord. indet. (DZMB_2023_0006)							+
	Speculator gen. inc.	++
	Alviniconcha marisindica+	+++					++						++	++
	Lepetodrilidae fam. inc.+										++	+	+
	Phymorhynchus sp. indet.+	+++					++		+++		+++	+++	++	+++
	Phymorhynchus sp. indet. (Egg capsules)+						+					+++	+++
	Scaphopoda ord. indet.	+					+		+		++		++	++
Platyhelminthes	Polycladida fam. indet.+						+						+
Porifera	Porifera cl. indet. (DZMB_2022_0010)											+
	Porifera cl. indet. (DZMB_2022_0017)						+					+++
	Porifera cl. indet. (DZMB_2022_0018)	+++				+	++++	+	+	+++		+++	++++	+++
	Porifera cl. indet. (DZMB_2022_0019)	+					++					+++	++	+++
	Porifera cl. indet. (DZMB_2022_0020)							+					+
	Porifera cl. indet. (DZMB_2022_0022)						+
	Porifera cl. indet. (DZMB_2022_0024)											+++
	Paleodictyon nodosum											++++
	Axinellida fam. indet.					+	+++	++	++		++		++	+++
	Abyssocladia gen. inc. (DZMB_2022_0006)								+			++
	Abyssocladia gen. inc. (DZMB_2022_0007)	+++					++					++		++
	Euchelipluma gen. inc.													+++
	Geodia gen. inc.						++				++	++	++	++
	Hyalonema gen. inc.										++		++	++
	Hyalonema gen. inc. (DZMB_2022_0033)						++			+		++
	Bathydorus gen. inc.											++	++	+
	Caulophacus gen. inc.						++						++	++
	Chonelasma gen. inc.											++
	Tretodictyidae gen. indet.												+	+
	Hexactinellida Hexactinella ord. inc.						++	+		+	+
Foraminifera	Monothalamea ord. indet. (DZMB_2021_0080)												+
	Monothalamea ord. indet. (DZMB_2021_0081)						++					+
	Monothalamea ord. indet. (DZMB_2022_0008)								+
	Luffammina gen. inc.									+++
	Psammina gen. inc. (DZMB_2021_0083)											++
	Psammina gen. inc. (DZMB_2021_0084)								+			++
