# Supplementary material
Source: Research Square preprint supplement (doi:10.21203/rs.3.rs-9695993/v1)
Supplement: Supplementary file 3 [file 87be034a20bb59867eab6dbb.xlsx]

## Sheet: Imagery per station
Supplementary Table 6a: All Stations of the total of 28916 annotated taxa within the active, inactive, periphery and surrounding non-vent areas. Table includes vent field locality, number of stations, number of photographs, number of frame grabs, hours of video imagery and covered bottom distance.
	No of stations	Photographs	Frame grabs	Video (h:min)	Distance (m)
Sum Total	153	94123	94508	1015:13	606612
Sonne	6	3606	-	12:47:00	16318
Alpha	16	7309	6970	144:29	61533
Edmond	16	5920	2089	60:52	45912
Gauss	13	2964	4332	56:56	57137
Score	19	6697	7466	90:54	82572
Kairei	16	11284	4655	154:24	52296
Kaimana	22	16629	6177	149:52	70011
Surya	1	575	575	6:20	1620
Sooraj	8	3660	2231	43:43	13450
Pelagia	8	-	45281	48:25	32687
JIM	14	7330	2952	84:50	59651
New Sonne	8	5782	2031	43:10	13634
Huna	7	4943	3353	42:52	35190
Penumbra	12	13664	4925	144:32	51021
Umbra	1	-	412	7:39	1490
Lux	3	3760	1059	23:28	12090

## Sheet: Technical specification
Supplementary Table 6b: Technical specifications of all gears used for imagery collection including camera system and information regarding the resolution (dots per inch (dpi), bit rate.
Gear and location				Video specification				Camera specification
Gear	Abbreviation	Location	Station	Frame rate	Bit rate	Pixel resolution	Megapixel	Camera system	Dots per inch	Megapixel
Multi Functional Tool	MFT	Sonne	INDEX2013-17MFT	25 fps	8,555 kBits sec-1	1440X1080	1.6 mp	Canon Power Shot G9	180 dpi	12 mp
			INDEX2013-24MFT
			INDEX2013-25MFT
		Edmond	INDEX2013-38MFT
			INDEX2013-44MFT
			INDEX2013-47MFT
		Gauss	INDEX2013-40MFT
			INDEX2013-47MFT
			INDEX2013-48MFT
			INDEX2013-54MFT
		Score	INDEX2013-40MFT
			INDEX2013-44MFT
			INDEX2013-50MFT
			INDEX2013-54MFT
		Kairei	INDEX2013-29MFT
STROMER	STR	ALPHA	INDEX2022-070STR	29 fps	15,186 kBits sec-1	1920X1080	2.1 mp	Canon Power Shot G15	180 dpi	12 mp
		Edmond	INDEX2022-032STR
		Kairei	INDEX2021-106STR
			INDEX2021-108STR
		Kaimana	INDEX2021-86STR
			INDEX2021-87STR
			INDEX2021-89STR
			INDEX2021-92STR
			INDEX2021-93STR
			INDEX2021-95STR
			INDEX2021-116STR
		Sooraj	INDEX2021-77STR
			INDEX2021-78STR
		JIM	INDEX2022-014STR
			INDEX2022-015STR
			INDEX2023-089STR
		New Sonne	INDEX2017-83STR
			INDEX2017-86STR
			INDEX2017-94STR
		Huna	INDEX2022-048STR
		Penumbra	INDEX2022-045STR
			INDEX2022-047STR
		Lux	INDEX2023-120STR
Video Sledge	VS	Alpha	INDEX2015-46VS	25 fps	171,355 kBits sec-1	1920X1080	2.1 mp	-	-	-
			INDEX2015-48VS
		Edmond	INDEX2015-61VS
		Gauss	INDEX2015-52VS
			INDEX2015-54VS
			INDEX2015-57VS
			INDEX2015-61VS
		Score	INDEX2015-52VS
			INDEX2015-54VS
			INDEX2015-57VS
			INDEX2015-59VS
			INDEX2015-61VS
		Pelagia	INDEX2014-28VS
			INDEX2014-31VS
			INDEX2014-33VS
			INDEX2014-46VS
			INDEX2014-47VS
			INDEX2014-49VS
Golden Eye	GE	ALPHA	INDEX2019-144GE	23 fps	25,350 kBits sec-1	1920X1080	2.1 mp	video frame grabs	72 dpi	21.4 mp
			INDEX2023-018GE
		Gauss	INDEX2019-145GE
		Score	INDEX2019-145GE
		Kairei	INDEX2019-135GE
			INDEX2019-138GE
		Kaimana	INDEX2019-141GE_A
			INDEX2019-141GE_B
			INDEX2023-017GE
		JIM	INDEX2023-011GE
		Huna	INDEX2021-02GE
		Penumbra	INDEX2021-05GE
ROV Kiel 6000	ROV Kiel 6000	Sonne	INDEX2013-57ROV	25 fps	4,128 kBits sec-1	704X576	0.4 mp	Canon Power Shot G5	180 dpi	5 mp
			INDEX2013-59ROV
			INDEX2013-62ROV
		Edmond	INDEX2013-36ROV
			INDEX2013-39ROV
			INDEX2013-49ROV
			INDEX2013-55ROV
		Gauss	INDEX2013-49ROV
			INDEX2013-51ROV
		Score	INDEX2013-55ROV
		Kairei	INDEX2013-28ROV
			INDEX2013-31ROV
			INDEX2013-35ROV
ROV Victor 6000	ROV Victor 6000	Kairei	INDEX2016-02ROV	25 fps	768 kBits sec-1	1440X1080	1.6 mp	video frame grabs	72 dpi	2.1 mp
			INDEX2016-06ROV
			INDEX2016-12ROV
		Pelagia	INDEX2016-16ROV
			INDEX2016-20ROV
ROV ROPOS	ROV ROPOS	ALPHA	INDEX2015-37ROV	30 fps	50,384 kBits sec-1	1920X1080	2.1 mp	Nikon D700/ D810	300 dpi	12 mp/ 36 mp
			INDEX2015-43ROV
			INDEX2015-45ROV
			INDEX2015-47ROV
			INDEX2015-49ROV
			INDEX2022-069ROPOS
			INDEX2022-071ROPOS
			INDEX2022-073ROPOS
			INDEX2023-034ROPOS
			INDEX2023-037ROPOS
			INDEX2023-049ROPOS
		Edmond	INDEX2015-51ROV
			INDEX2015-56ROV
			INDEX2015-58ROV
			INDEX2015-62ROV
			INDEX2019-27ROPOS
			INDEX2019-31ROPOS
			INDEX2023-045ROPOS
		Gauss	INDEX2015-56ROV
			INDEX2019-33ROPOS
		Score	INDEX2015-51ROV
			INDEX2015-53ROV
			INDEX2015-56ROV
			INDEX2015-60ROV
			INDEX2015-62ROV
			INDEX2019-31ROPOS
			INDEX2023-047ROPOS
			INDEX2023-051ROPOS
		Kairei	INDEX2018-82ROPOS
			INDEX2019-73ROPOS
			INDEX2021-84ROPOS
			INDEX2022-066ROPOS
			INDEX2022-068ROPOS
		Kaimana	INDEX2018-85ROPOS
			INDEX2018-95ROPOS
			INDEX2018-97ROPOS
			INDEX2018-99ROPOS
			INDEX2019-36ROPOS
			INDEX2019-40ROPOS
			INDEX2019-42ROPOS
			INDEX2019-56ROPOS
			INDEX2019-58ROPOS
			INDEX2023-055ROPOS
			INDEX2023-058ROPOS
			INDEX2023-067ROPOS
		Surya	INDEX2019-83ROPOS
		Sooraj	INDEX2021-80ROPOS
			INDEX2021-83ROPOS
			INDEX2022-061ROPOS
			INDEX2022-063ROPOS
			INDEX2022-065ROPOS
			INDEX2023-070ROPOS
		JIM	INDEX2022-051ROPOS
			INDEX2022-053ROPOS
			INDEX2022-055ROPOS
			INDEX2022-058ROPOS
			INDEX2022-060ROPOS
			INDEX2023-081ROPOS
			INDEX2023-084ROPOS
			INDEX2023-091ROPOS
			INDEX2023-093ROPOS
			INDEX2023-096ROPOS
		New Sonne	INDEX2018-71ROPOS
			INDEX2018-73ROPOS
			INDEX2018-75ROPOS
			INDEX2018-80ROPOS
			INDEX2023-103ROPOS
		Huna	INDEX2018-70ROPOS
			INDEX2019-102ROPOS
			INDEX2019-104ROPOS
			INDEX2019-106ROPOS
			INDEX2023-115ROPOS
		Penumbra	INDEX2018-57ROPOS
			INDEX2018-59ROPOS
			INDEX2018-61ROPOS
			INDEX2018-63ROPOS
			INDEX2018-65ROPOS
			INDEX2018-67ROPOS
			INDEX2019-127ROPOS
			INDEX2022-043ROPOS
			INDEX2023-112ROPOS
		Umbra	INDEX2022-041ROPOS
		Lux	INDEX2023-109ROPOS
			INDEX2023-117ROPOS
