# Supplementary material
Source: Research Square preprint supplement (doi:10.21203/rs.3.rs-9695993/v1)
Supplement: Supplementary file 4 [file 8c11e3446ed8dbdf214add59.xlsx]

## Sheet: Tabelle1
STable1: Main characteristics of the described vent field and associated massive occurrences, including fluid temperatures, pH, crustal ages, geological context, mineralization type and assemblages. Abbrevations: icb = isocubanite, cpy = chalcopyrite, py = pyrite, sl = sphalerite, si = silica, FeOOH = Ironoxyhydroxides, ata = atacamite, an = anhydrite
Cluster	Field	Characteristics of vents fluid	Tmax (°C) of vent fluid	pH25	NaCl (wt%)	Crustal ages	Distance to axis center (km)	Spreading-rate (cm/year) & -style	Geological association	Mineralization type	Mineral assemblages
#04	ALPHA	black smoker, brine-type / phase-separated, sub-critical	351	3.2	4.3	149000	3.5	4.7, asymmetric	Site is located at the inner axial valley flank about 6 km to the east of the CIR axis and approx. 700 m shallower that the CIR axis. It is located at the end of the ridge segment close to a non-transform offset following ca. 3 km to the NW. Site is in structural association with a nascent OCC.	high-temperature	cpy; cpy-py-sl-si; sl-si
#04	EDMOND	black smoker, brine-type / phase-separated, super-critical	418	3.3	4.9	196000	4.6	4.7, asymmetric	Site is located at the inner axial valley flank about 6.9 km to the east of the CIR axis and approx. 500 m shallower than the CIR axis. It is located about 15 km to the SE of the non-transform offset marking the end of this CIR segment. Site is in structural association with bookshelf-arranged normal faults bounding the inner rift valley flank.	high-temperature	icb-cpy-py; cpy-py-sl; sl-si
#04	GAUSS	inactive	-	-	-	221000	5.2	4.7, asymmetric	Site is located at the inner axial valley flank about 8.2 km to the east of the CIR axis and approx. 750 m shallower than the CIR axis. It is located about 1.5 km to the NE of EDMOND. It is located about 15 km to the SE of the non-transform offset marking the end of this CIR segment. Site is in structural association with bookshelf-arranged normal faults bounding the inner rift valley flank. It i…	high to intermediate-temperature	cpy-ata; py-sl; py-si
#04	SCORE	inactive	-	-	-	213000	5	4.7, asymmetric	SCORE is bound to the same large normal fault as GAUSS but is located between 300 and 850 m further to the SE. Distance to CIR axis is the same as with GAUSS, but SCORE is 650 m shallopwer than the axis.	high to intermediate-temperature	cpy-py; py-sl-si; py-sl
#05	KAIMANA	black smoker, brine-type / phase-separated, sub-critical	328	3.6	3.7	361000	8.3	4.6, asymmetric	KAIMANA is located about 15 km to the NW of the Rodriguez Triple Junction, on the western flank of the first CIR segment. It is further located about 9 km in perpendicular direction away from the CIR axis and is ca. 1100 m shallower than the seafloor at the axis. Furthermore it is located on the NE flank of a NW-SE running ridge which might once have been the western flank of the first CIR segmen…	high-temperature	icp-cpy; cpy-py-sl-si; py-sl
#05	KAIREI	black smoker, brine-type / phase-separated, sub-critical	365	3.3	3.6	400000	9.2	4.6, asymmetric	KAIREI is located 8.5 km to the east of the first CIR segment. Thus, it lies in the same CIR segment as KAIMANA but on the opposite flank. The water depth at KAIREI is about 1700 m shallower than the CIR ridge axis and this way is significantly shallower compared to the ridge axis depth than the other SMS on the southern CIR. It is bound to the inner slope of the eastern ridge flank. This slopes …	high-temperature	icb-cpy; py; si-an
#06	SURYA	diffuse fluids, vapour-type / modified seawater	31	6.5	-	264000	7	5.3, symmetric	The SURYA hydrothermal field is located in the middle of the first SEIR segment south of RTJ. The SEIR segment is characterized by axis parallel normal faults running along the entire segment. SURYA is bound to the western flank along one of these large normal faults. It is located 7.1 km to the SW of the ridge axis and lies about 800 m shallower than the ridge axis.	high-temperature	cpy-py-si
#07	SOORAJ	black smoker, vapour-type / phase-separated, sub-critical	304	4.3	4.2	275000	7.7	5.6, asymmetric	The location of the PELAGIA field is similar to that of SURYA in that it almost lies in the middle of an SEIR segment which is characterized by linear axis parallel fault structures making up the bounding flanks. In contrast to Surya, however, PELAGIA is located dierectly on the ridge axis. It is the only SMS field in the BGR contract area located directly on the ridge axis! Thus, with 3680 m it …	high-temperature	cpy-si; cpy-py-sl-FeOOH; si-an
#08	PELAGIA	black smoker / single phase	356	3.2	3	7000	0.2	5.8, symmetric	The location of the PELAGIA field is similar to that of SURYA in that it almost lies in the middle of an SEIR segment which is characterized by linear axis parallel fault structures making up the bounding flanks. In contrast to Surya, however, PELAGIA is located dierectly on the ridge axis. It is the only SMS field in the BGR contract area located directly on the ridge axis! Thus, with 3680 m it …	high to intermediate-temperature	cpy-py, py-si
#09	JIM	inactive	296	5.5	3.8	321000	9	5.6, symmetric	The JIM SMS field is located in a bathymetric high within the non-transform fault separating two SEIR segments. The bathymetric high itself is located at the inside corner of the non-transform fault. JIM is located about 10 km south of the non-transform fault center and in about 1400 m shallower water depth than the non-transform center. JIM is structurally associated with cross-cutting fault sys…	unclear, likely high-temperature sub-seafloor mineralization	cpy-py-sl; py-FeOOH; si-FeOOH
#11	NEW SONNE	clear fluids, vapour-type / phase-separated, sub-critical	342	4.1	1.8	98000	3	6.1, symmetric	The NEW SONNE SMS field is located in the middle of the 4th SEIR segment. This segment is characterized by ridge axis parallel, large normal faults making up the prominent inner ridge valley flanks. The NEW SONNE field sits on top of the eastern valley flank, 2.9 km awy from the SEIR axis and approx. 750 m above the rift valley floor. The general structural SEIR setting is similar to SURYA and PE…	high-temperature	cpy-py; py-si
#12	HUNA	clear fluids, vapour-type / phase-separated, sub-critical	296	4.9	0.9	428000	12.2	5.7, symmetric	The SMS fields HUNA, PENUMBRA, LUX, and UMBRA are located on a volcanic plateau between 12 and 17 km away from the SEIR axis. HUNA (12 km away) and PENUMBRA (14 km) are bound to large normal faults (> 7 km strike length) running parallel to the ridge axis. There are more of these parallel running normal faults appearing nearer to the ridge axis which look like a series of rotated fault blocks arr…	intermediate temperature (subseafloor)	cpy-py; py-sl-si; si
#12	PENUMBRA	black smoker, vapour-type / phase-separated, sub-critical	352	3.2	1.6	491000	14	5.7, symmetric		high-temperature	cpy-py; py
#12	LUX	inactive	-	-		537000	15.3	5.7, symmetric			cpy; py; py-sl-si
#12	UMBRA	inactive	-	-		604000	17.2	5.7, symmetric		unclear	-
