# Supplementary material
Source: Research Square preprint supplement (doi:10.21203/rs.3.rs-9695993/v1)
Supplement: Supplementary file 5 [file 8d546b73adfee35edda9f125.xlsx]

## Sheet: Tabelle1
STable 2: List of taxa annotated within the active vent fields Alpha, Edmond, Kairei, Kaimana, Surya, Sooraj, Pelagia, JIM, New Sonne, Huna, Penumbra and Lux (from north to south). Presence of each taxon indicated as low ('+'), medium ('++'), high ('+++') or very high ('++++') abundance. Abundance is semi-quantitative presented as categories based on number of annotations. Low abundance = 1 speci…
Phylum	Taxa annotated within active vents	ALPHA	Edmond	Kairei	Kaimana	Surya	Sooraj	Pelagia	JIM	New Sonne	Huna	Penumbra	Lux
Annelida	Errantia ord. indet.				++
	Archinome jasoni sp. inc.+	+++		++++			++++		++++			+++
	Branchipolynoe gen. inc.+	++	+
	Lepidonotopodium gen. inc. (DZMB_2021_0001)+	++	++	++	++		++	++	+	++	++	+++	+
	Polynoidae fam. inc.				++		+			+	++	++
	Sabellidae gen. indet.	+			++
	Oasisia gen. inc.+	+++	++++	+++							+++
	Acrocirridae fam. inc.				++			++			+
	Paralvinella mira sp. inc.+		+		+					+	++++	++++
Arthropoda	Amphipoda ord. inc.				+					+
	Decapoda fam. indet.											+++
	Munidopsis sp. indet.	+++			+++	++	+++	+++	+	+	+++	+++
	Munidopsis pallida sp. inc.							+	+++		++	++
	Paguroidea superfam. inc.				++						++	+++
	Nephropidae fam. inc.											+
	Austinograea rodriguezensis+	++++	+++	+++	++++	+++	+++	++++	+++	++++	+++	++++
	Caridea spp. indet. (DZMB_2022_0028)	++			++		++	+			++	+++
	Alvinocaris solitaire sp. inc.+	++++	++++	++++	++++		++	+++	+++	++++	+++	++++
	Mirocaris indica sp. inc.+	+++	+++		++	+	+++	++		++	++	+++
	Rimicaris kairei+	++++	++++	++++	++++	++	++++	+++	++++	+++	+++	++++
	Nematocarcinus gen. inc.						++				++	+
	Nematocarcinus gen. inc. (DZMB_2021_0004)					++					++	+++
	Nematocarcinus gen. inc. (DZMB_2021_0005)				++	+					++
	Cerataspis monstrosus sp. inc.	+			+++	+	++	++	++		+++	+++
	Munnopsidae fam. inc. (DZMB_2021_0006)				++
	Cirripedia ord. indet.			++
	Neolepas marisindica sp. inc.+	++++		++++	++	++	+++	+++	+	++++	+++	++++	++
	Trianguloscalpellum regium sp. inc.+							+++		+++	+++	+++
	Verrucidae fam. inc.+				+++		+			++		+++
Bryozoa	Bryozoa cl. indet.											+
	Bifaxaria gen. inc.									++
	Cheilostomatida fam. indet. (DZMB_2021_0008)									+		++
Chordata	Teleostei ord. indet.	++			++	++		+++		++	++	++++
	Anguilliformes fam. indet.						++					++
	Synaphobranchidae gen. indet.	++	+	++	++		++	+	+++		+++	++++
	Histiobranchus gen. inc.				+		+
	Synaphobranchidae Ilyophis brunneus fam. inc.				+
	Bathysaurus mollis sp. inc.				++				+	+		+
	Bathypterois sp. indet.	+									++
	Ipnops agassizii sp. inc.											++
	Gadiformes Macrouridae ord. inc.	++			++		+			++	++	+++
	Macrouridae gen. indet.								+
	Coryphaenoides gen. inc.	+			++		++				++	++
	Coryphaenoides armatus sp. inc.	++			+++	++		+++		+	++	+++
	Coryphaenoides longifilis sp. inc.											+
	Chaunacops gen. inc.					+
	Notacanthiformes ord. inc.							+		++		+++
	Aldrovandia affinis gen. inc.	++			++	++	+			+	+	+++
	Halosauropsis macrochir gen. inc.	+			+				+		++	++++
	Ophidiidae fam. inc.										++	++
	Ophidiidae gen. indet. (DZMB_2021_0014)											+
	Barathrites iris sp. inc.	+				+	+				++	+++
	Bassozetus gen. inc.							+				+
	Spectrunculus crassus sp. inc.					++
	Spectrunculus grandis sp. inc.											++
	Xyelacyba myersi gen. inc.										++	+
	Pachycara angeloi+	+++	++	++	+++	++	+++	++	+	++		+++
	Ascidiacea ord. indet.						+
	Octacnemidae gen. indet.				+
Cnidaria	Cnidaria cl. indet. (DZMB_2022_0002)				+							++
	Hexacorallia ord. indet. (DZMB_2023_0007)											++
	Actiniaria fam. indet.									+	+	++
	Actiniaria fam. indet. (DZMB_2021_0017)	++			++						+	++
	Actiniaria fam. indet. (DZMB_2021_0018)									+
	Actiniaria fam. indet. (DZMB_2021_0019)	+			++		+++
	Actiniaria fam. indet. (DZMB_2021_0020)	+++					+				++	+
	Actiniaria fam. indet. (DZMB_2021_0025)	+++			++		+++	+++		+	+++	+++
	Actinoscyphiidae gen. indet. (DZMB_2021_0026)						++					+
	Actinoscyphia sp. indet.				++
	Actinostolidae gen. indet.	++			+++	++	+++		+	++	+++	+++
	Actinostola gen. inc.						++
	Actinostola sp. indet. (DZMB_2021_0028)				++	+++				+		+
	Actinostola sp. indet. (DZMB_2021_0030)						++					++
	Actinostola sp. indet. (DZMB_2021_0031)				+						++	++
	Chondrophellia sp. indet.	+			+	++	+			+	++
	Maractis sp. indet.+	++++	++++	++++	++++	+++	+++	++++	++++	++++	+++	++++	+
	Iridogorgia magnispiralis sp. inc.				++							+++
	Clavulariidae gen. indet. (DZMB_2021_0036)						+++					++
	Coralliidae fam. inc.											+
	Keratoisididae fam. inc.						++				++	++++
	Keratoisididae Acanella gen. inc.										+
	Keratoisididae Bathygorgia gen. inc.						+
	Keratoisididae Jasonisis gen. inc.				+++	+						+++
	Keratoisididae Keratoisis gen. inc.											++
	Keratoisididae Lepidisis gen. inc. (DZMB_2022_0003)						+
	Lepidisis spp. indet.	+			++++	++++	++			++	+++	+++
	Primnoidae gen. indet.					+
	Antipatharia ord. inc.				++							++
	Heteropathes sp. indet.	++			++	+					+	+++
	Bathypathes patula sp. inc.	++			+++	+	1				+	++
	Pennatuloidea superfam. inc. (DZMB_2021_0052)											+
	Umbellula sp. indet. (DZMB_2021_0055)										++	++
	Zoantharia fam. indet.	+++			++		++++				+++	+++
	Zoantharia fam. indet. (DZMB_2021_0056)	+++	++		+++	++		++	++++		++	+++
	Zoantharia fam. indet. (DZMB_2021_0057)								++
	Hydrozoa ord. indet.	+++			+++		+++				++	+++
	Candelabrum sp. indet.+	++						+	+
	Corymorphidae gen. indet.									+
	Scyphozoa ord. indet.	++				+		++
Echinodermata	Asteroidea ord. indet.	++			++	++	+		++		++	+++
	Freyellidae fam. inc.				++	++						+
	Goniasteridae gen. indet.						+++				++	++
	Goniasteridae gen. indet. (DZMB_2021_0066)								++			+
	Goniasteridae gen. indet. (DZMB_2021_0067)								++
	Circeaster gen. inc.										+	++
	Lydiaster johannae sp. inc.										++	+
	Antedonidae gen. indet. (DZMB_2023_0003)					+
	Echinoidea ord. indet.											++
	Irregularia infracl. inc.											+
	Hapalosoma sp. indet.				+
	Salenocidaris sp. indet.											++
	Holothuroidea ord. indet.				++			++		+	+	++
	Holothuroidea ord. indet. (DZMB_2023_0010)							+
	Holothuroidea ord. indet. (DZMB_2023_0011)							+
	Holothuroidea ord. indet. (DZMB_2023_0012)							+
	Holothuroidea ord. indet. (DZMB_2023_0013)							+
	Holothuroidea ord. indet. (DZMB_2023_0014)							+
	Holothuroidea ord. indet. (DZMB_2023_0015)							+
	Chiridota hydrothermica sp. inc.+	++	++		+++	+		+++	+++	++++	++	+++
	Elpidiidae gen. indet.					+	+
	Enypniastes eximia										+
	Psychropotidae gen. indet.								+			+
	Synallactidae fam. inc.				+				+			+
	Synallactidae gen. indet. (DZMB_2021_0075)				+						+
	Synallactidae gen. indet. (DZMB_2021_0076)				+	+					+
	Synallactes sp. indet.										++
	Ophiuroidea ord. indet.				++		+		++		+	+++
	Ophiosphalma gen. inc.										++	++++
	Ophiosphalma armigerum sp. inc.				++							++
Mollusca	Bathymodiolus septemdierum sp. inc.+	++++	+++	++++	++++	++	+++	++++	++++	++++	++++	++++
	Cirroteuthis sp. indet.	+
	Gastropoda ord. indet.	+			+	+		+		+		++
	Gastropoda ord. indet. (DZMB_2023_0006)					+					++
	Abyssochrysoidea superfam. inc.+							+++
	Alviniconcha marisindica+	+++	+++	++++	++++	++	++++	++++		++++	+++	++++
	Provanna gen. inc.									+	+
	Lepetodrilidae fam. inc.+	++			++++	++	+++		++++	+++	+++	++++
	Lepetodrilidae Lepetodrilus gen. inc.+						++	+++		+++	+++	++++
	Lepetodrilidae Lepetodrilus sp. indet.+			+++	+++			+++		+++	+++	+++
	Phymorhynchus sp. indet.+	+++	+++	+++	+++	+++	+++	+++	++++	+++	++++	++++
	Phymorhynchus sp. indet. (Egg capsules)+	+++	+++	++++	++		+++		+++	++	++	++++
	Chrysomallon squamiferum+	++		++++	++			+++		++++	++	++++
	Solenogastres ord. indet.+	+						++
Nemertea	Thermanemertes gen. inc.+			+++								++
Platyhelminthes	Polycladida fam. indet.+	++	+++		++		+++		+++	++		++
Porifera	Porifera cl. indet. (DZMB_2022_0018)	++			+++	++		++		+	++	+++
	Porifera cl. indet. (DZMB_2022_0019)				++	+						++
	Porifera cl. indet. (DZMB_2022_0020)										+
	Porifera cl. indet. (DZMB_2022_0022)										+
	Porifera cl. indet. (DZMB_2022_0024)				+++
	Axinellida fam. indet.				++							+
	Abyssocladia gen. inc. (DZMB_2022_0006)				++		+++					+
	Abyssocladia gen. inc. (DZMB_2022_0007)				++	++					++	++
	Hyalonema gen. inc.								+
	Hyalonema gen. inc. (DZMB_2022_0033)				+
	Bathydorus gen. inc.				+++
Foraminifera	Monothalamea ord. indet. (DZMB_2021_0080)				+
