# Supplementary material
Source: Research Square preprint supplement (doi:10.21203/rs.3.rs-9695993/v1)
Supplement: Supplementary file 6 [file b0746824c1325a77f9a96644.xlsx]

## Sheet: Tabelle1
STable 4: List of inactive taxa within the vent fields Sonne, Alpha, Gauss, Score, Kairei, Kaimana, Sooraj, Pelagia, JIM, New Sonne, Huna, Penumbra, Umbra and Lux (from north to south). Presence of each taxon indicated as low ('+'), medium ('++'), high ('+++') or very high ('++++') density. Low density = 1 specimen, medium = 2-9 specimens, high 10-49 specimens and very high ≥ 50 specimens. Taxa a…
Phylum	Inactive vent taxa	Sonne	Alpha	Gauss	Score	Kairei	Kaimana	Sooraj	Pelagia	JIM	New Sonne	Huna	Penumbra	Umbra	Lux
Annelida	Lepidonotopodium gen. inc. (DZMB_2021_0001)+										+
	Polynoidae fam. inc.		++	++		++	++
	Acrocirridae fam. inc.			+	++		++		++			+
Arthropoda	Amphipoda ord. inc.					+
	Decapoda fam. indet.											+	++
	Munidopsis sp. indet.		+++	++	+		++	+	++			+++
	Munidopsis aries sp. inc.						+
	Munidopsis pallida sp. inc.	+	++	++	+					+++	+	+	+
	Paguroidea superfam. inc.				++		++					++
	Thymopides laurentae sp. inc.		+
	Austinograea rodriguezensis+						++					++	+
	Caridea spp. indet. (DZMB_2022_0028)		++	++	++		++	++				+	++
	Caridea spp. indet. (DZMB_2022_0030)			+
	Caridea spp. indet. (DZMB_2022_0032)			++
	Rimicaris kairei+		++	++	++		+++				+	++	++
	Nematocarcinus gen. inc.						++						++
	Nematocarcinus gen. inc. (DZMB_2021_0004)			++	++		++			++		+	++
	Nematocarcinus gen. inc. (DZMB_2021_0005)			++	++
	Cerataspis monstrosus sp. inc.		++	++	+++		+++	+	++	++		++	++
	Munnopsidae fam. inc. (DZMB_2021_0006)			+
	Munnopsidae fam. inc. (DZMB_2021_0007)						+++
	Glyptelasma gen. inc.						+						+++
Bryozoa	Cheilostomatida fam. indet. (DZMB_2021_0008)												+
Chordata	Teleostei ord. indet.		++	++	++		++	+	+			++	+++
	Synaphobranchidae gen. indet.		++	++	++		++						++
	Histiobranchus gen. inc.		+
	Bathysaurus mollis sp. inc.		++		+		++			+		+
	Bathypterois sp. indet.											+
	Ipnops agassizii sp. inc.				+++							+
	Gadiformes Macrouridae ord. inc.		++	+			++	+	+				+
	Coryphaenoides gen. inc.		+					++				++
	Coryphaenoides gen. inc. (DZMB_2021_0012)									+
	Coryphaenoides armatus sp. inc.		++		++		++		+
	Coryphaenoides longifilis sp. inc.					++	+
	Notacanthiformes ord. inc.		+	++	+++						+		++
	Aldrovandia affinis gen. inc.		+	++	++		++			++		++
	Halosauropsis macrochir gen. inc.						+	+				++	+++
	Ophidiidae fam. inc.						++					++
	Ophidiidae fam. inc. (DZMB_2021_0016)									+
	Acanthonus armatus gen. inc.											++
	Barathrites iris sp. inc.		++
	Spectrunculus grandis sp. inc.												+
	Xyelacyba myersi gen. inc.											++
	Pachycara angeloi+											+
Cnidaria	Cnidaria cl. indet. (DZMB_2022_0002)				+								+
	Hexacorallia ord. indet. (DZMB_2023_0008)											+	++
	Actiniaria fam. indet.												+
	Actiniaria fam. indet. (DZMB_2021_0017)		+				+						+
	Actiniaria fam. indet. (DZMB_2021_0018)				+
	Actiniaria fam. indet. (DZMB_2021_0020)		+++				++	+
	Actiniaria fam. indet. (DZMB_2021_0025)		+++	+	++		++		++		++		++
	Actinoscyphiidae gen. indet. (DZMB_2021_0026)						+	++
	Actinoscyphia sp. indet.											++	+
	Actinostolidae gen. indet.		+++				++	++		++	+	+++	++
	Actinostola gen. inc.						+	+				+
	Actinostola sp. indet. (DZMB_2021_0030)		+++
	Actinostola sp. indet. (DZMB_2021_0031)												++
	Bathyphellia sp. indet. (DZMB_2021_0032)		+
	Chondrophellia sp. indet.		+++				+	++					+
	Maractis sp. indet.+		++++	+			++		++	++		++	+
	Iridogorgia magnispiralis sp. inc.											+	+
	Coralliidae fam. inc.									+
	Keratoisididae fam. inc.						++					++	++
	Keratoisididae Bathygorgia gen. inc.			+						++		+
	Keratoisididae Jasonisis gen. inc.			+	+								++
	Keratoisididae Keratoisis gen. inc. (DZMB_2021_0047)									++
	Lepidisis spp. indet.		++	++			+++			++	++	+++	++++
	Antipatharia ord. inc.									+	+	+	+
	Heteropathes sp. indet.		+
	Bathypathes patula sp. inc.		++				+++			+
	Umbellula sp. indet. (DZMB_2021_0055)						+					++	+
	Zoantharia fam. indet.		++++			+++	++	++				++
	Zoantharia fam. indet. (DZMB_2021_0056)				++		++
	Epizoanthus sp. indet.				+
	Hydrozoa ord. indet.		+++	++	++			+				+
	Candelabrum sp. indet.+		+
	Corymorphidae gen. indet.									+
	Scyphozoa ord. indet.			+++	++	+			++
Echinodermata	Asteroidea ord. indet.			++	++					+		++	++
	Brisingida fam. indet.						++	+
	Hymenodiscus gen. inc.							+
	Freyellidae fam. inc.		++	++	++		++			++	++	++	+
	Freyastera gen. inc.										+
	Freyella gen. inc.			++			+
	Goniasteridae gen. indet.		+					++				++
	Goniasteridae gen. indet. (DZMB_2021_0066)									+		+	+
	Circeaster gen. inc.		+		+
	Antedonidae gen. indet. (DZMB_2021_0068)							+
	Antedonidae gen. indet. (DZMB_2023_0003)		+		++
	Echinoidea ord. indet.				+								+
	Hapalosoma sp. indet.				++					+
	Holothuroidea ord. indet.			++	++		+	+				+
	Elpidiidae gen. indet. (DZMB_2021_0070)						+
	Enypniastes eximia			++	+		+					+
	Benthodytes sp. indet.											+
	Synallactidae gen. indet. (DZMB_2021_0075)									+
	Synallactidae gen. indet. (DZMB_2021_0076)			+	+
	Synallactidae gen. indet. (DZMB_2021_0077)									++
	Ophiuroidea ord. indet.			++			++				++		+++
	Ophiacanthida ord. inc.						+
	Ophiosphalma gen. inc.									++		++	++
	Ophiosphalma armigerum sp. inc.						+						+
Mollusca	Octopoda fam. indet.											+
	Grimpoteuthis gen. inc.							++
	Gastropoda ord. indet.					+							+
	Gastropoda ord. indet. (DZMB_2023_0006)			++
	Alviniconcha marisindica+						+					+++
	Lepetodrilidae fam. inc.+			+
	Phymorhynchus sp. indet.+											++	+
Porifera	Porifera cl. indet.									+
	Porifera cl. indet. (DZMB_2022_0010)			+
	Porifera cl. indet. (DZMB_2022_0014)			+
	Porifera cl. indet. (DZMB_2022_0017)						+++
	Porifera cl. indet. (DZMB_2022_0018)		+++	++	+++		+++	+		+++	++	+++	+
	Porifera cl. indet. (DZMB_2022_0019)		++	++	++		++				+		+
	Porifera cl. indet. (DZMB_2022_0020)			+
	Porifera cl. indet. (DZMB_2022_0022)				+		+
	Porifera cl. indet. (DZMB_2022_0023)		++
	Porifera cl. indet. (DZMB_2022_0024)						+
	Axinellida fam. indet.			++						++
	Abyssocladia gen. inc. (DZMB_2022_0006)		+++		+			+++		++	+		++	+	++
	Abyssocladia gen. inc. (DZMB_2022_0007)		++++		++	+		++		+++		++
	Geodia gen. inc.			++				++		++	++
	Hyalonema gen. inc.									++
	Hyalonema gen. inc. (DZMB_2022_0033)			++
	Farreidae Farrea gen. inc.									+
	Caulophacus gen. inc.									++
	Tretodictyidae fam. inc. (DZMB_2023_0009)									++
	Hexactinellida Hexactinella ord. inc.			+
