# Supplementary material
Source: Research Square preprint supplement (doi:10.21203/rs.3.rs-9695993/v1)
Supplement: Supplementary file 7 [file f9232b5d64b7f3ed65b8fd48.xlsx]

## Sheet: Tabelle1
STable 3: List of active vent taxa at diffuse venting areas within the active vent fields Alpha, Edmond, Kairei, Kaimana, Sooraj, Pelagia, New Sonne and Penumbra (from north to south). Presence of each taxon indicated as low ('+'), medium ('++'), high ('+++') or very high ('++++') density. Low density = 1 specimen, medium = 2-9 specimens, high 10-49 specimens and very high ≥ 50 specimens. Taxa an…
Phylum	Diffuse Flow taxa	Alpha	Edmond	Kairei	Kaimana	Sooraj	Pelagia	New Sonne	Penumbra
Annelida	Lepidonotopodium gen. inc. (DZMB_2021_0001)+					+
	Polynoidae fam. inc.					+
Arthropoda	Decapoda fam. indet.							+
	Munidopsis sp. indet.					++
	Munidopsis pallida sp. inc.							+
	Austinograea rodriguezensis+							+
	Caridea spp. indet. (DZMB_2022_0028)								+
	Alvinocaris solitaire sp. inc.+					+
	Rimicaris kairei+					+		+	+
	Pantopoda ord. inc.						++	+
Chordata	Synaphobranchidae gen. indet.					+
	Synaphobranchidae Ilyophis brunneus fam. inc.			+
	Gadiformes Macrouridae ord. inc.							+
	Coryphaenoides gen. inc. (DZMB_2021_0012)	+						+
	Coryphaenoides armatus sp. inc.							+
	Notacanthiformes ord. inc.								++
	Aldrovandia affinis gen. inc.					+
	Halosauropsis macrochir gen. inc.								++
	Spectrunculus crassus sp. inc.							++
	Spectrunculus grandis sp. inc.				+			+	++
Cnidaria	Actiniaria fam. indet.					+			+
	Actiniaria fam. indet. (DZMB_2021_0025)							++++
	Actinoscyphiidae gen. indet. (DZMB_2021_0026)					++
	Actinostolidae gen. indet.								+
	Actinostola sp. indet. (DZMB_2021_0028)							+
	Actinostola sp. indet. (DZMB_2021_0030)					+++		++
	Maractis sp. indet.+					+++		++
	Clavulariidae gen. indet. (DZMB_2021_0036)							+++
	Lepidisis spp. indet.							++
	Bathypathes patula sp. inc.					+
	Zoantharia fam. indet.					+++
	Zoantharia fam. indet. (DZMB_2021_0056)							++++
	Hydrozoa ord. indet.					+++
	Hydrozoa ord. indet. (DZMB_2021_0059)					+++
Echinodermata	Asteroidea ord. indet.								+
	Freyella gen. inc.				+
	Goniasteridae gen. indet.					+
	Oneirophanta sp. indet.					+
Mollusca	Abyssochrysoidea superfam. inc.+					+		+++	+++
	Phymorhynchus sp. indet.+	++++	+	+++	+++		+++	++++	+++
	Melanodrymiidae fam. inc.				+++
Nemertea	Thermanemertes gen. inc.+								+
Platyhelminthes	Polycladida fam. indet.+	+++		++++	++++
Porifera	Abyssocladia gen. inc. (DZMB_2022_0006)					+++
